# Supplementary material for: Fibronectin binding protein B binds to loricrin and promotes corneocyte adhesion by Staphylococcus aureus
Source: PubMed Central journal article supplement (PMC9076634; doi:10.1038/s41467-022-30271-1), 2022-05-06
Supplement: 41467_2022_30271_MOESM1_ESM.pdf [file 41467_2022_30271_MOESM1_ESM.pdf]

1  
2 **SUPPLEMENTARY INFORMATION**  
3  
4

5 **Fibronectin binding protein B binds to loricrin and promotes corneocyte**  
6 **adhesion by *Staphylococcus aureus***  
7

8 Thaina M. da Costa<sup>1§</sup>, Albertus Viljoen<sup>2§</sup>, Aisling M. Towell<sup>1</sup>, Yves F. Dufrêne<sup>2,3\*</sup>, Joan  
9 A. Geoghegan<sup>1,4\*</sup>  
10

11 <sup>1</sup>Department of Microbiology, Moyne Institute of Preventive Medicine, School of  
12 Genetics and Microbiology, Trinity College Dublin, Dublin 2, Ireland.

13 <sup>2</sup>Louvain Institute of Biomolecular Science and Technology, UC Louvain, Croix du Sud,  
14 4-5, bte L7.07.07, B-1348 Louvain-la-Neuve, Belgium.

15 <sup>3</sup>Walloon Excellence in Life sciences and Biotechnology (WELBIO), Wavre, Belgium.

16 <sup>4</sup>Institute of Microbiology and Infection, University of Birmingham, Edgbaston,  
17 Birmingham, B15 2TT, United Kingdom.  
18

19 *§These authors contributed equally*

20 \*Corresponding authors: Joan A. Geoghegan ([j.geoghegan@bham.ac.uk](mailto:j.geoghegan@bham.ac.uk)), Yves F.  
21 Dufrêne ([yves.dufrene@uclouvain.be](mailto:yves.dufrene@uclouvain.be))  
22  
23  
24

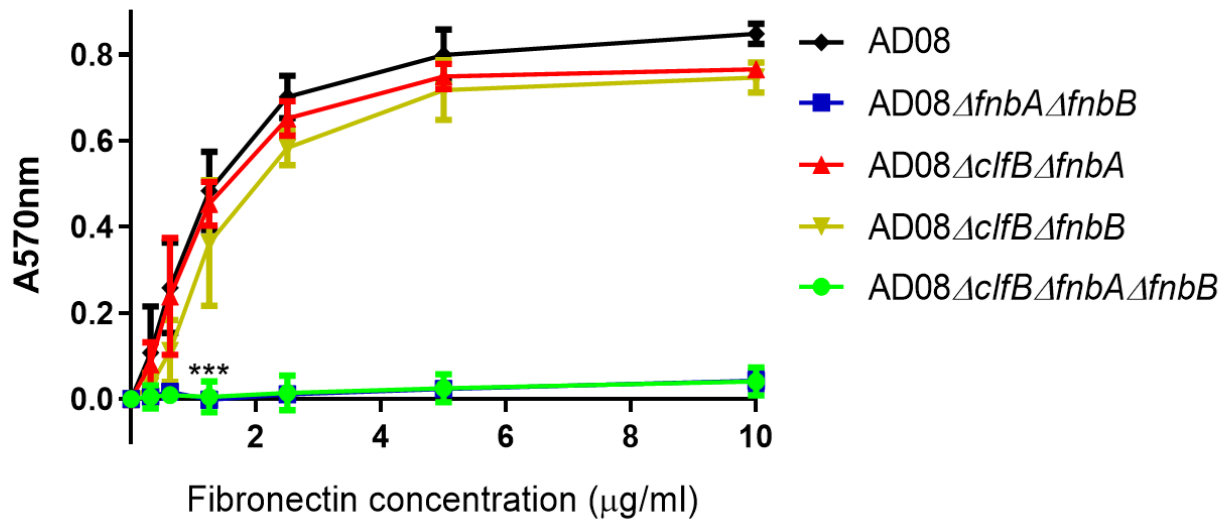

25

26 **Supplementary Figure 1. Adherence of AD08 mutants to fibronectin.**

27 AD08 or mutants deficient in ClfB and/or FnBPA and/or FnBPB were grown to  
 28 exponential phase ( $OD_{600} = 0.35$ ), adjusted to an  $OD_{600}$  of 1.0 and incubated in microtiter  
 29 plates coated with fibronectin. Following incubation, the wells were washed, adherent  
 30 cells were stained with crystal violet, and the absorbance was read at 570 nm. The datum  
 31 points on the graph represent the mean values of three independent biological  
 32 experiments and error bars show the standard deviation. Statistical analysis was  
 33 performed using a two-way ANOVA with a Dunnett's multiple comparison test to compare  
 34 variances between AD08 and the mutants at the 1.25 μg/mL fibronectin concentration.  
 35 No symbol indicates  $P > 0.05$ . \*\*\*,  $P = 0.0001$ .

36

37

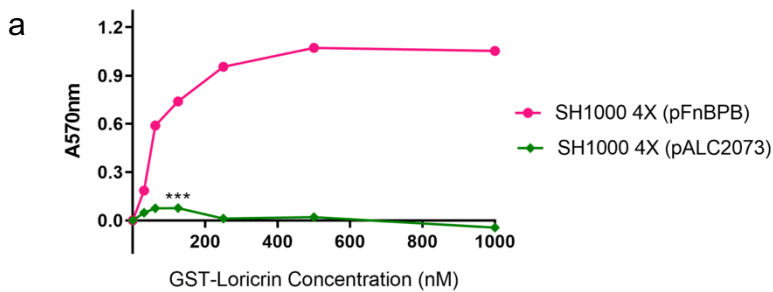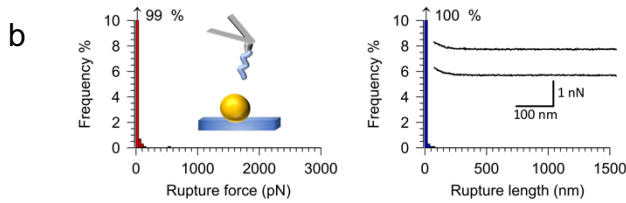

38  
 39 **Supplementary Figure 2. *S. aureus* SH1000 deficient in ClfA, ClfB, FnBPA and**  
 40 **FnBPB does not bind to loricrin. a) SH1000 and the mutant deficient in ClfA, ClfB,**  
 41 **FnBPA and FnBPB (SH1000 4X) were grown to exponential phase ( $OD_{600} = 0.35$ ),**  
 42 **adjusted to an  $OD_{600}$  of 1.0 and incubated in microtiter plates coated with GST-loricrin.**  
 43 **Following incubation, the wells were washed, adherent cells were stained with crystal**  
 44 **violet, and the absorbance was read at 570 nm. The graph shows results from a single**  
 45 **experiment that is representative of three independent experiments. The ligand**  
 46 **concentration given on the x-axis is the concentration of the solution used to coat the**  
 47 **wells. Statistical analysis was performed using a two-way ANOVA with a Sidak's multiple**  
 48 **comparison test to compare variances between the wild type and the mutant at the 125**  
 49 **nM loricrin concentration. \*\*\*,  $P = 0.00078$ . b) AFM tips modified with loricrin were used**  
 50 **to probe single exponentially grown ( $OD_{600} = 0.35$ ) staphylococcal cells. Data for one**  
 51 **representative *S. aureus* SH1000 4X cell showing the absence of interaction with loricrin.**  
 52 **Left. Histogram plot of rupture forces. Right. Histogram plot of rupture lengths with inset**  
 53 **showing three representative curves.**

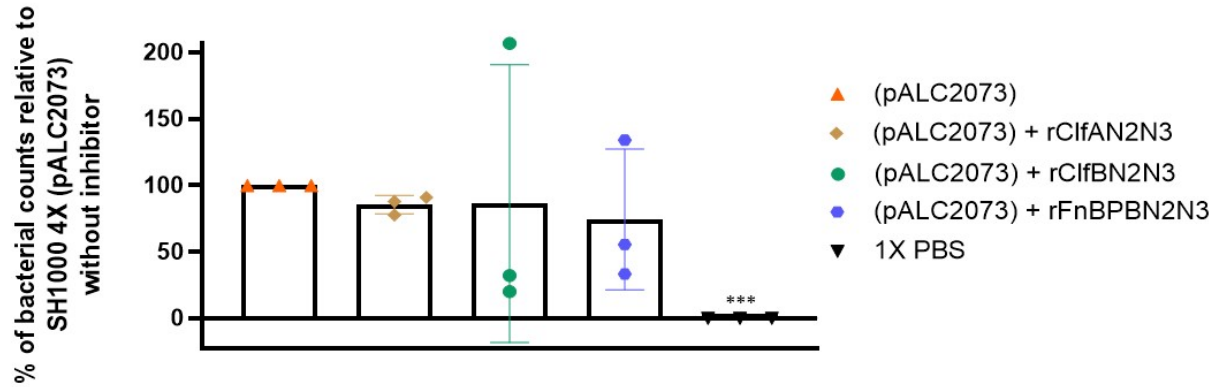

54  
55 **Supplementary Figure 3. Recombinant proteins do not affect *S. aureus* SH1000 4X**  
56 **(pALC2073) adherence to healthy human skin corneocytes.** Bacteria were grown in  
57 TSB to exponential phase ( $OD_{600} = 0.35$ ), adjusted to an  $OD_{600} = 1.0$  and incubated with  
58 tape strips containing corneocytes previously treated with rClfAN2N3 or rClfBN2N3 or  
59 rFnBPBN2N3. Each datum point is from a different biological replicate, and the bars  
60 represent the means of three independent experiments, with error bars showing the  
61 standard deviation. A no bacteria control was used where PBS alone was incubated with  
62 the corneocytes. Tape strips were washed, and adherent bacteria were stained with  
63 crystal violet. The number of bacteria cells adhering to 10 corneocytes was counted and  
64 the percentage of adherence is shown as comparison with total adherence of SH1000 4X  
65 (pFnBPB) to corneocytes that were not pre-treated with recombinant protein. Statistical  
66 analysis was performed using a one-way ANOVA with a Dunnett's multiple comparison  
67 test to compare variances between *S. aureus* SH1000 4X (pALC2073) adhering to  
68 corneocytes without recombinant protein to the *S. aureus* SH1000 4X (pALC2073)  
69 adhering to corneocytes treated with recombinant protein, and the no bacteria control.  
70 \*\*\*,  $P = 0.000091$ .

71

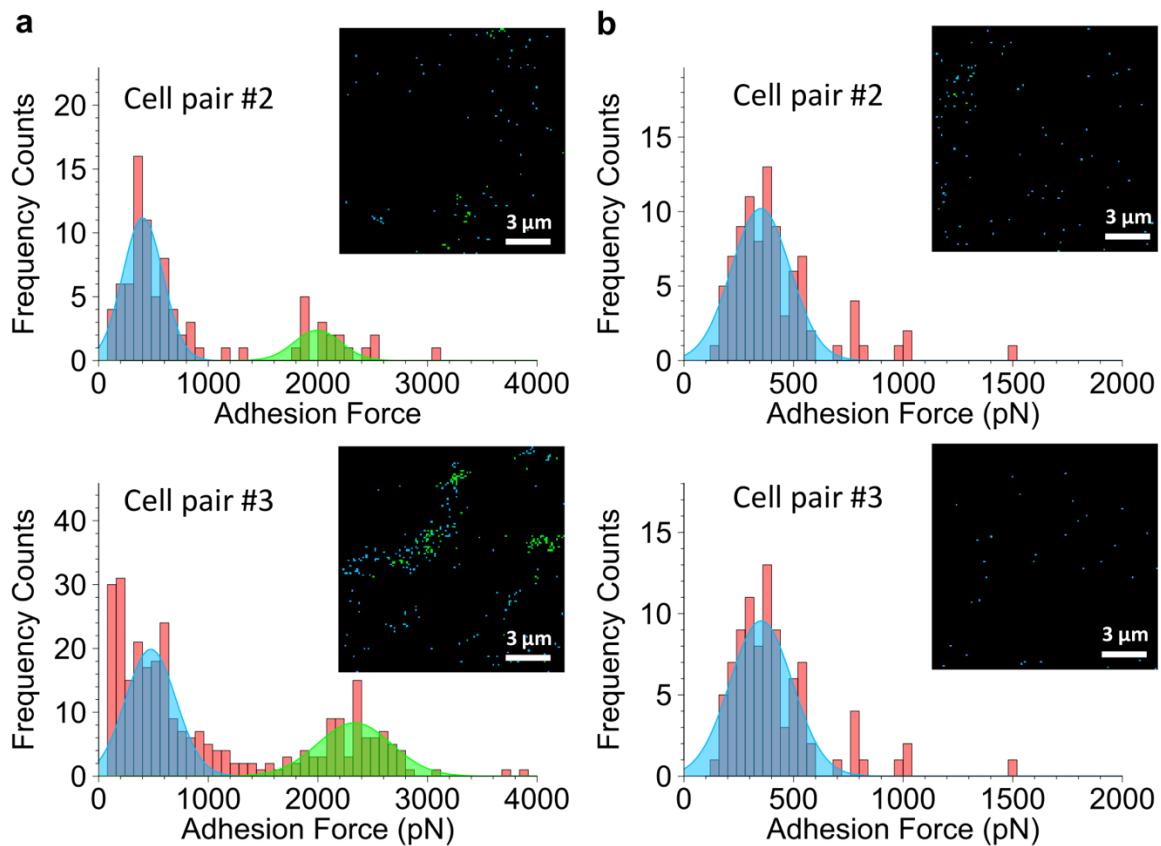

72

73 **Supplementary Figure 4. FnBPB expressed on living *S. aureus* cells forms**  
 74 **ultrastrong single molecular complexes with ligands exposed on corneocyte**

75 **surfaces.** (a) Data for two more *S. aureus* SH1000 4X (pFnBPB) cells used to probe  
 76 corneocytes in quantitative imaging mode. Histograms of binding forces with inset of the

77 corresponding adhesion map. Black pixels show where zero adhesion was measured,  
 78 blue pixels show where adhesive interactions between 0 and 1,000 pN were detected.

79 Green pixels are where adhesive interactions greater than 1,000 pN were detected. (b)

80 Data obtained when two more control cells that do not express FnBPB [*S. aureus* SH1000  
 81 4X (pALC2073)] were used to probe corneocytes.

82

83

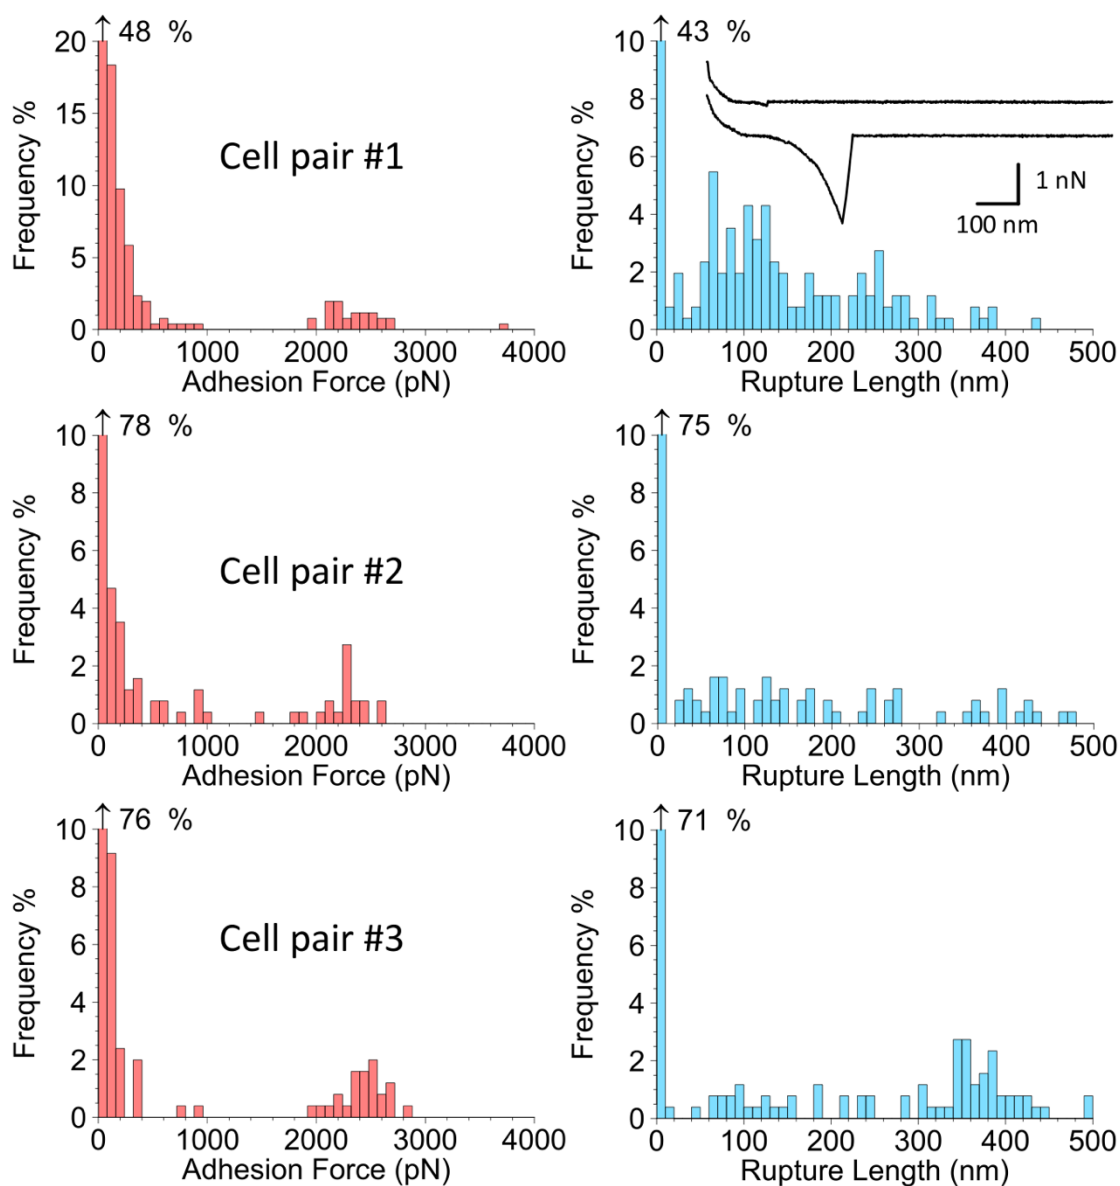

84

85 **Supplementary Figure 5.** Low retraction-speed ( $1 \mu\text{m}\cdot\text{s}^{-1}$ ) force volume mode  
 86 recordings using *S. aureus* SH1000 4X (pFnBPB) cell probes to probe corneocytes. A  
 87 force volume map was recorded on a  $2 \times 2 \mu\text{m}$  area ( $16 \times 16$  pixels) of a corneocyte  
 88 where ultrastrong binding ( $> 2,000$  pN) was previously detected in QI mode (for cell pair  
 89 1, see Figure 7b; and for cell pairs 2 and 3, see Supplementary Figure 4a). Shown are  
 90 adhesion force (left) and rupture length (right) histograms. The inset shows two  
 91 representative retraction profiles.

92 **Supplementary Table 1. Bacterial strains.**

| <b>Strain</b>                                                       | <b>Description</b>                                                                  | <b>Reference</b> |
|---------------------------------------------------------------------|-------------------------------------------------------------------------------------|------------------|
| Topp3                                                               | <i>E. coli</i> strain deficient in proteases for expression of recombinant proteins | Stratagene       |
| XL-1 Blue                                                           | <i>E. coli</i> strain for deficient in proteases expression of recombinant proteins | Stratagene       |
| IM01B                                                               | <i>E. coli</i> strain for plasmid propagation. SA08BQPN25-hsdS                      | 1                |
| AD08                                                                | <i>S. aureus</i> atopic dermatitis clinical isolate                                 | 2                |
| AD08 $\Delta$ <i>clfB</i> $\Delta$ <i>fnbA</i>                      | AD08 deficient in <i>clfB</i> and <i>fnbA</i>                                       | 3                |
| AD08 $\Delta$ <i>clfB</i> $\Delta$ <i>fnbB</i>                      | AD08 deficient in <i>clfB</i> and <i>fnbB</i>                                       | 3                |
| AD08 $\Delta$ <i>fnbA</i> $\Delta$ <i>fnbB</i>                      | AD08 deficient in <i>fnbA</i> and <i>fnbB</i>                                       | 3                |
| AD08 $\Delta$ <i>clfB</i> $\Delta$ <i>fnbA</i> $\Delta$ <i>fnbB</i> | AD08 deficient in <i>clfB</i> and <i>fnbA</i> and <i>fnbB</i>                       | 3                |
| SH1000                                                              | <i>S. aureus</i> strain 8325-4 derivative with a restored <i>rsbU</i> gene          | 4                |
| SH1000 4X                                                           | SH1000 deficient in <i>clfA</i> and <i>clfB</i> and <i>fnbA</i> and <i>fnbB</i>     | 5                |

93

94

95 **Supplementary Table 2. Plasmids**

| <b>Plasmid</b>                   | <b>Description</b>                                                                        | <b>Reference</b> |
|----------------------------------|-------------------------------------------------------------------------------------------|------------------|
| pGEX-4T2                         | <i>E. coli</i> vector for the expression of glutathione S-transferase. Amp <sup>r</sup> . | GE Lifesciences  |
| pGEX-4T2::HLor                   | pGEX-4T2 carrying the full-length cDNA encoding human loricrin. Amp <sup>r</sup> .        | 6                |
| pQE30::rClfB <sub>201-542</sub>  | pQE30 carrying the His-tagged N2 N3 recombinant ClfB. Amp <sup>r</sup> .                  | 6                |
| pQE30::rFnBPB <sub>162-480</sub> | pQE30 carrying the His-tagged N2 N3 recombinant FnBPB. Amp <sup>r</sup> .                 | 7                |
| pQE30::rClfA <sub>221-559</sub>  | pQE30 carrying the His-tagged N2 N3 recombinant FnBPB. Amp <sup>r</sup> .                 | 8                |
| pALC2073                         | Tetracycline inducible expression plasmid. Cm <sup>r</sup> .                              | 9                |
| pFnBPB                           | pALC2073 carrying the <i>fnbB</i> gene. Cm <sup>r</sup> .                                 | 3                |

96

97



98 **SUPPLEMENTARY REFERENCES**

- 99 1. Monk, I. R., Tree, J. J., Howden, B. P., Stinear, T. P. & Foster, T. J. Complete  
100 bypass of restriction systems for major *Staphylococcus aureus* lineages. *mBio* **6**,  
101 e00308-15 (2015).
- 102 2. Fleury, O. M. *et al.* Clumping factor B promotes adherence of *Staphylococcus*  
103 *aureus* to corneocytes in atopic dermatitis. *Infect. Immun.* **85**, e00994-16 (2017).
- 104 3. Towell, A. M. *et al.* *Staphylococcus aureus* binds to the N-terminal region of  
105 corneodesmosin to adhere to the stratum corneum in atopic dermatitis. *Proc. Natl.*  
106 *Acad. Sci. U. S. A.* **118**, e2014444118 (2021).
- 107 4. Horsburgh, M. J. *et al.*  $\sigma^B$  modulates virulence determinant expression and stress  
108 resistance: characterization of a functional *rsbU* strain derived from  
109 *Staphylococcus aureus* 8325-4. *J. Bacteriol.* **184**, 5457–5467 (2002).
- 110 5. O'Neill, E. *et al.* A novel *Staphylococcus aureus* biofilm phenotype mediated by  
111 the fibronectin-binding proteins, FnBPA and FnBPB. *J. Bacteriol.* **190**, 3835–3850  
112 (2008).
- 113 6. Mulcahy, M. E. *et al.* Nasal colonisation by *Staphylococcus aureus* depends upon  
114 clumping factor B binding to the squamous epithelial cell envelope protein loricrin.  
115 *PLoS Pathog.* **8**, e1003092 (2012).
- 116 7. Burke, F. M., McCormack, N., Rindi, S., Speziale, P. & Foster, T. J. Fibronectin-  
117 binding protein B variation in *Staphylococcus aureus*. *BMC Microbiol.* **10**, (2010).
- 118 8. O'Connell, D. P. *et al.* The fibrinogen-binding MSCRAMM (clumping factor) of  
119 *Staphylococcus aureus* has a Ca<sup>2+</sup>-dependent inhibitory site. *J. Biolog. Chem.*  
120 **273**, 6821–6829 (1998).
- 121 9. Bateman, B. T., Donegan, N. P., Jarry, T. M., Palma, M. & Cheung, A. L.  
122 Evaluation of a Tetracycline-Inducible Promoter in *Staphylococcus aureus* In Vitro  
123 and In Vivo and Its Application in Demonstrating the Role of *sigB* in Microcolony  
124 Formation. *Infect. Immun.* **69**, 7851–7857 (2001).

125

126
